# Supplementary material for: Using adopted individuals to partition indirect maternal genetic effects into prenatal and postnatal effects on offspring phenotypes
Source: eLife. 2022 Jul 13;11:e73671. doi: 10.7554/eLife.73671 (PMC9323003; doi:10.7554/eLife.73671)
Supplement: Supplementary file 1. [file elife-73671-supp1.xlsx]

## Sheet: Sheet1
Supplementary File 1. SNPs used to construct a weighted polygenic score of maternal birthweight. SNPs were selected from Supplemetary Table 5 in Warrington et al. (2019) if they have "SEM-adjusted Maternal Effects" with p<5.0 x 10-8.
SNP	Chromosome	Position hg19 (bp)	Effect Allele	Other Allele	Beta	Standard Error	P-value
rs560887	2	169763148	C	T	0.038	0.005	5.4e-14
rs9855896	3	14287150	G	A	0.033	0.006	2.6e-09
rs11708067	3	123065778	A	G	0.029	0.005	3.8e-08
rs4679760	3	155855418	G	C	0.038	0.005	6.5e-15
rs2946179	5	157886627	C	T	0.045	0.005	3.7e-17
rs9379084	6	7231843	G	A	0.04	0.007	4.7e-08
rs45446698	7	99332948	G	T	0.077	0.012	1.1e-10
rs6995390	8	77611012	T	A	0.039	0.006	3.9e-10
rs72760655	9	116916214	C	A	0.031	0.005	7.6e-10
rs10509669	10	95969913	A	T	0.039	0.005	3.6e-13
rs3740360	10	96025491	C	A	0.044	0.007	1.6e-09
rs2168101	11	8255408	C	A	0.039	0.005	5.9e-14
rs10830963	11	92708710	G	C	0.046	0.005	4.6e-19
rs180438	12	47187260	G	A	0.039	0.006	4.1e-11
rs3184504	12	111884608	C	T	0.034	0.005	1.8e-13
rs3784789	15	75082552	G	C	0.03	0.005	1.2e-09
rs12909648	15	86224570	G	A	0.027	0.005	3.4e-09
rs34717629	17	17610404	A	G	0.032	0.006	4.4e-08
rs2967677	19	8789721	C	T	0.05	0.007	3.8e-14
rs6608539	23	115132834	A	G	0.027	0.004	1.1e-09
*rs2967676 was not included because it is in complete linkage disequilibrium with rs2967677.
