# Supplementary material for: Using adopted individuals to partition indirect maternal genetic effects into prenatal and postnatal effects on offspring phenotypes
Source: eLife. 2022 Jul 13;11:e73671. doi: 10.7554/eLife.73671 (PMC9323003; doi:10.7554/eLife.73671)
Supplement: Supplementary file 3. — 1000 biological parent-offspring trios, 4000 biological mother-offspring pairs, 1800 biological father-offspring pairs, 300,000 singletons, 6000 adopted individuals, and 50 biological mother-adopted offspring pairs. Covariance between parental genotypes was fixed at 0. [file elife-73671-supp3.xlsx]

## Sheet: Sheet1
Supplementary File 3. Comparison of power estimated from asymptotic calculations and simulations using varying sizes of prenatal maternal genetic effects (γm), paternal genetic effects (βp) or offspring genetic effects (βo) with sample sizes approximating the number of individuals in UK Biobank with educational attainment information (1000 biological parent-offspring trios, 4000 biological mother…
Power to detect pre-natal maternal effect (γm)														Power to detect post-natal maternal effect (βm)
Asymptotic power							Simulation power (95% confidence interval)							Asymptotic power							Simulation power (95% confidence interval)
γm	Varying βm with βp and βo = 0						γm	Varying βm with βp and βo = 0						βm	Varying γm with βp and βo = 0						βm	Varying γm with βp and βo = 0
	0	0.05	0.1	0.3	0.5			0	0.05	0.1	0.3	0.5			0	0.05	0.1	0.3	0.5			0	0.05	0.1	0.3	0.5
0	0.0500002	0.0500002	0.0500008	0.0500085	0.0500373		0	0.042 (0.030, 0.054)	0.048 (0.035, 0.061)	0.050 (0.036, 0.064)	0.053 (0.039, 0.067)	0.055 (0.041, 0.069)		0	0.0500001	0.0500001	0.0500006	0.050006	0.0500234		0	0.058 (0.044, 0.072)	0.057 (0.043, 0.071)	0.063 (0.048, 0.078)	0.056 (0.042, 0.070)	0.048 (0.035, 0.061)
0.05	0.201837	0.20237	0.203525	0.214596	0.236975		0.05	0.193 (0.169, 0.217)	0.194 (0.169, 0.219)	0.196 (0.171, 0.221)	0.217 (0.191, 0.243)	0.249 (0.222, 0.276)		0.05	0.305872	0.306292	0.307438	0.320209	0.352286		0.05	0.326 (0.297, 0.355)	0.324 (0.295, 0.353)	0.325 (0.296, 0.354)	0.334 (0.305, 0.363)	0.360 (0.330, 0.390)
0.1	0.614039	0.617619	0.622931	0.6614	0.725506		0.1	0.600 (0.570, 0.630)	0.596 (0.566, 0.626)	0.599 (0.569, 0.629)	0.644 (0.614, 0.674)	0.728 (0.700, 0.756)		0.1	0.82817	0.829738	0.832376	0.854253	0.897095		0.1	0.835 (0.812, 0.858)	0.835 (0.812, 0.858)	0.839 (0.816, 0.862)	0.863 (0.842, 0.884)	0.899 (0.880, 0.918)
0.15	0.924113	0.927106	0.930956	0.952625	0.976566		0.15	0.914 (0.897, 0.931)	0.917 (0.900, 0.934)	0.921 (0.904, 0.938)	0.945 (0.931, 0.959)	0.979 (0.970, 0.988)		0.15	0.992034	0.992334	0.992759	0.99544	0.998533		0.15	0.990 (0.984, 0.996)	0.990 (0.984, 0.996)	0.991 (0.985, 0.997)	0.994 (0.989, 0.999)	0.998 (0.995, 1.000)
0.2	0.995333	0.995824	0.996377	0.998564	0.999731		0.2	0.995 (0.991, 0.999)	0.998 (0.995, 1.000)	0.998 (0.995, 1.000)	0.998 (0.995, 1.000)	0.999 (0.997, 1.000)		0.2	0.999949	0.999954	0.99996	0.999987	0.999999		0.2	1 (1, 1)	1 (1, 1)	1 (1, 1)	1 (1, 1)	1 (1, 1)
0.25	0.999927	0.999943	0.999957	0.999993	1		0.25	1 (1, 1)	1 (1, 1)	1 (1, 1)	1 (1, 1)	1 (1, 1)		0.25	1	1	1	1	1		0.25	1 (1, 1)	1 (1, 1)	1 (1, 1)	1 (1, 1)	1 (1, 1)
γm	Varying βp with βm and βo = 0						γm	Varying βp with βm and βo = 0						βm	Varying βp with γm and βo = 0						βm	Varying βp with γm and βo = 0
	0	0.05	0.1	0.3	0.5			0	0.05	0.1	0.3	0.5			0	0.05	0.1	0.3	0.5			0	0.05	0.1	0.3	0.5
0	0.0500001	0.0500001	0.0500003	0.0500024	0.0500054		0	0.042 (0.030, 0.054)	0.045 (0.032, 0.058)	0.046 (0.033, 0.059)	0.047 (0.034, 0.060)	0.054 (0.040, 0.068)		0	0.0500001	0.0500002	0.0500007	0.0500063	0.0500149		0	0.058 (0.044, 0.072)	0.056 (0.042, 0.070)	0.057 (0.043, 0.071)	0.057 (0.043, 0.071)	0.063 (0.048, 0.078)
0.05	0.201837	0.202264	0.203567	0.218137	0.250474		0.05	0.193 (0.169, 0.217)	0.195 (0.170, 0.220)	0.204 (0.179, 0.229)	0.224 (0.198, 0.250)	0.238 (0.212, 0.264)		0.05	0.305872	0.306263	0.307908	0.327	0.364668		0.05	0.326 (0.297, 0.355)	0.318 (0.289, 0.347)	0.318 (0.289, 0.347)	0.329 (0.300, 0.358)	0.367 (0.337, 0.397)
0.1	0.614039	0.614289	0.616961	0.652337	0.726234		0.1	0.600 (0.570, 0.630)	0.598 (0.568, 0.628)	0.605 (0.575, 0.635)	0.647 (0.617, 0.677)	0.717 (0.689, 0.745)		0.1	0.82817	0.829367	0.832356	0.859958	0.901811		0.1	0.835 (0.812, 0.858)	0.835 (0.812, 0.858)	0.836 (0.813, 0.859)	0.858 (0.836, 0.880)	0.898 (0.879, 0.917)
0.15	0.924113	0.923844	0.924945	0.94196	0.970277		0.15	0.914 (0.897, 0.931)	0.913 (0.896, 0.930)	0.915 (0.898, 0.932)	0.935 (0.920, 0.950)	0.965 (0.954, 0.976)		0.15	0.992034	0.992239	0.992659	0.995651	0.998398		0.15	0.990 (0.984, 0.996)	0.990 (0.984, 0.996)	0.991 (0.985, 0.997)	0.993 (0.988, 0.998)	0.997 (0.994, 1.000)
0.2	0.995333	0.995249	0.995343	0.997165	0.999276		0.2	0.995 (0.991, 0.999)	0.997 (0.994, 1.000)	0.996 (0.992, 1.000)	0.998 (0.995, 1.000)	0.999 (0.997, 1.000)		0.2	0.999949	0.999952	0.999958	0.999986	0.999998		0.2	1 (1, 1)	1 (1, 1)	1 (1, 1)	1 (1, 1)	1 (1, 1)
0.25	0.999927	0.999923	0.999924	0.999966	0.999997		0.25	1 (1, 1)	1 (1, 1)	1 (1, 1)	1 (1, 1)	1 (1, 1)		0.25	1	1	1	1	1		0.25	1 (1, 1)	1 (1, 1)	1 (1, 1)	1 (1, 1)	1 (1, 1)
γm	Varying βo with βm and βp = 0						γm	Varying βo with βm and βp = 0						βm	Varying βo with γm and βp = 0						βm	Varying βo with γm and βp = 0
	0	0.05	0.1	0.3	0.5			0	0.05	0.1	0.3	0.5			0	0.05	0.1	0.3	0.5			0	0.05	0.1	0.3	0.5
0	0.0500002	0.0500002	0.0500008	0.0500085	0.0500373		0	0.042 (0.030, 0.054)	0.043 (0.030, 0.056)	0.043 (0.030, 0.056)	0.043 (0.030, 0.056)	0.043 (0.030, 0.056)		0	0.0500001	0.0500001	0.0500001	0.0500001	0.0500001		0	0.058 (0.044, 0.072)	0.058 (0.044, 0.072)	0.058 (0.044, 0.072)	0.058 (0.044, 0.072)	0.058 (0.044, 0.072)
0.05	0.201837	0.202619	0.204208	0.220103	0.26076		0.05	0.193 (0.169, 0.217)	0.193 (0.169, 0.217)	0.196 (0.171, 0.221)	0.212 (0.187, 0.237)	0.245 (0.218, 0.272)		0.05	0.305872	0.306788	0.309002	0.332816	0.393208		0.05	0.326 (0.297, 0.355)	0.327 (0.298, 0.356)	0.327 (0.298, 0.356)	0.346 (0.317, 0.375)	0.395 (0.365, 0.425)
0.1	0.614039	0.617309	0.622823	0.669949	0.768559		0.1	0.600 (0.570, 0.630)	0.605 (0.575, 0.635)	0.612 (0.582, 0.642)	0.649 (0.619, 0.679)	0.748 (0.721, 0.775)		0.1	0.82817	0.829912	0.833515	0.866537	0.926338		0.1	0.835 (0.812, 0.858)	0.838 (0.815, 0.861)	0.842 (0.819, 0.865)	0.874 (0.853, 0.895)	0.925 (0.909, 0.941)
0.15	0.924113	0.926573	0.930215	0.954881	0.985737		0.15	0.914 (0.897, 0.931)	0.917 (0.900, 0.934)	0.918 (0.901, 0.935)	0.946 (0.932, 0.960)	0.986 (0.979, 0.993)		0.15	0.992034	0.992309	0.992805	0.996253	0.999333		0.15	0.990 (0.984, 0.996)	0.990 (0.984, 0.996)	0.990 (0.984, 0.996)	0.993 (0.988, 0.998)	1 (1, 1)
0.2	0.995333	0.995722	0.996231	0.998655	0.999912		0.2	0.995 (0.991, 0.999)	0.997 (0.994, 1.000)	0.998 (0.995, 1.000)	0.998 (0.995, 1.000)	1 (1, 1)		0.2	0.999949	0.999953	0.99996	0.99999	1		0.2	1 (1, 1)	1 (1, 1)	1 (1, 1)	1 (1, 1)	1 (1, 1)
0.25	0.999927	0.999939	0.999953	0.999994	1		0.25	1 (1, 1)	1 (1, 1)	1 (1, 1)	1 (1, 1)	1 (1, 1)		0.25	1	1	1	1	1		0.25	1 (1, 1)	1 (1, 1)	1 (1, 1)	1 (1, 1)	1 (1, 1)
