# Supplementary material for: Using adopted individuals to partition indirect maternal genetic effects into prenatal and postnatal effects on offspring phenotypes
Source: eLife. 2022 Jul 13;11:e73671. doi: 10.7554/eLife.73671 (PMC9323003; doi:10.7554/eLife.73671)
Supplement: Supplementary file 4. — 1000 biological parent-offspring trios, 4000 biological mother-offspring pairs, 1800 biological father-offspring pairs, 300,000 singletons, 6000 adopted individuals, and 50 biological mother-adopted offspring pairs. Path coefficients representing postnatal or prenatal maternal genetic effects, paternal genetic effects (βp) and offspring genetic effects (βo) were fixed to 0.1. Covariance between parental genotypes was fixed to 0. [file elife-73671-supp4.xlsx]

## Sheet: Sheet1
Supplementary File 4. Comparison of power to detect pre-natal (γm) and post-natal (βm) maternal genetic effects estimated from asymptotic calculations and simulations using varying sample size for each of the 7 family structures and the remaining family structures approximating the number of individuals in the UK Biobank with educational attainment data (1000 biological parent-offspring trios, 40…
a. Power to detect pre-natal maternal effect (γm)
Family structure	Asymptotic power							Simulation power (95% confidence interval)
	Sample size							Sample size
	0	2000	4000	6000	8000	10000		0	2000	4000	6000	8000	10000
G1: Parent offspring trios	0.49884	0.72528	0.817387	0.863763	0.890653	0.907833		0.508 (0.477, 0.539)	0.734 (0.707, 0.761)	0.791 (0.766, 0.816)	0.844 (0.822, 0.866)	0.883 (0.863, 0.903)	0.907 (0.889, 0.925)
G2: Mother offspring pairs	0.442164	0.593041	0.640235	0.662978	0.676325	0.685094		0.429 (0.398, 0.460)	0.602 (0.572, 0.632)	0.624 (0.594, 0.654)	0.656 (0.627, 0.685)	0.672 (0.643, 0.701)	0.680 (0.651, 0.709)
G3: Father offspring pairs	0.452564	0.651018	0.718941	0.752221	0.771805	0.784662		0.466 (0.435, 0.497)	0.664 (0.635, 0.693)	0.732 (0.705, 0.759)	0.764 (0.738, 0.790)	0.772 (0.746, 0.798)	0.783 (0.757, 0.809)
G4: Singletons	0.54403	0.563634	0.576769	0.586176	0.593242	0.598743		0.559 (0.528, 0.590)	0.586 (0.555, 0.617)	0.579 (0.548, 0.610)	0.595 (0.565, 0.625)	0.575 (0.544, 0.606)	0.590 (0.560, 0.620)
G5: Adopted singletons	0.104659	0.457441	0.581235	0.640235	0.674189	0.696112		0.144 (0.122, 0.166)	0.450 (0.419, 0.481)	0.604 (0.574, 0.634)	0.624 (0.594, 0.654)	0.676 (0.647, 0.705)	0.718 (0.690, 0.746)
G6: Adoptive mother adopted child pairs	0.640235	0.957154	0.988877	0.995688	0.997897	0.998812		0.624 (0.594, 0.654)	0.954 (0.941, 0.967)	0.988 (0.981, 0.995)	0.998 (0.995, 1.000)	0.998 (0.995, 1.000)	0.999 (0.997, 1.000)
G7: Biological mother adopted child pairs	0.606999	0.995387	0.999978	1	1	1		0.599 (0.569, 0.629)	0.998 (0.995, 1.000)	1 (1, 1)	1 (1, 1)	1 (1, 1)	1 (1, 1)
b. Power to detect post-natal maternal effect (βm)
Family structure	Asymptotic power							Simulation power (95% confidence interval)
	Sample size							Sample size
	0	2000	4000	6000	8000	10000		0	2000	4000	6000	8000	10000
G1: Parent offspring trios	0.750746	0.888584	0.924852	0.940537	0.949095	0.954431		0.725 (0.697, 0.753)	0.895 (0.876, 0.914)	0.905 (0.887, 0.923)	0.938 (0.923, 0.953)	0.947 (0.933, 0.961)	0.953 (0.940, 0.966)
G2: Mother offspring pairs	0.84155	0.845745	0.846722	0.847166	0.847426	0.847601		0.842 (0.819, 0.865)	0.849 (0.827, 0.871)	0.849 (0.827, 0.871)	0.842 (0.819, 0.865)	0.853 (0.831, 0.875)	0.860 (0.838, 0.882)
G3: Father offspring pairs	0.657624	0.855507	0.905369	0.926263	0.937441	0.944321		0.660 (0.631, 0.689)	0.839 (0.816, 0.862)	0.904 (0.886, 0.922)	0.925 (0.909, 0.941)	0.938 (0.923, 0.953)	0.954 (0.941, 0.967)
G4: Singletons	0.705488	0.735268	0.755056	0.769112	0.779592	0.787696		0.699 (0.671, 0.727)	0.731 (0.704, 0.758)	0.758 (0.731, 0.785)	0.769 (0.743, 0.795)	0.794 (0.769, 0.819)	0.784 (0.758, 0.810)
G5: Adopted singletons	0.118247	0.565195	0.758931	0.846722	0.89223	0.91856		0.137 (0.116, 0.159)	0.585 (0.554, 0.616)	0.755 (0.728, 0.782)	0.849 (0.827, 0.871)	0.894 (0.875, 0.913)	0.905 (0.887, 0.923)
G6: Adoptive mother adopted child pairs	0.846722	0.999834	1	1	1	1		0.849 (0.827, 0.871)	1 (1, 1)	1 (1, 1)	1 (1, 1)	1 (1, 1)	1 (1, 1)
G7: Biological mother adopted child pairs	0.820398	0.999198	0.999981	0.999999	1	1		0.821 (0.797, 0.845)	0.998 (0.995, 1.000)	1 (1, 1)	1 (1, 1)	1 (1, 1)	1 (1, 1)
