# Supplementary material for: Using adopted individuals to partition indirect maternal genetic effects into prenatal and postnatal effects on offspring phenotypes
Source: eLife. 2022 Jul 13;11:e73671. doi: 10.7554/eLife.73671 (PMC9323003; doi:10.7554/eLife.73671)
Supplement: Supplementary file 5. [file elife-73671-supp5.xlsx]

## Sheet: Sheet1
Supplementary File 5. Sensitivity analysis for the modelling of educational attainment in the UK Biobank using SNPs from the Okbay et al. 2016.
	Full sample
	Unweighted PRS			Weighted PRS
	Estimate	Std Error	P-value	Estimate	Std Error	P-value
Offspring effect	0.0265785	0.0233713	0.255443	1.88888	0.42604	9.26798e-06
Prenatal maternal effect	0.0264285	0.0517937	0.609865	1.33446	0.637764	0.0364019
Postnatal maternal effect	-0.0162315	0.0386329	0.674379	-1.10015	0.477693	0.0212763
Postnatal paternal effect	0.0216332	0.0309128	0.484044	0.788412	0.518401	0.128297
	Excluding adopted individuals with breastfeeding information
	Unweighted PRS			Weighted PRS
	Estimate	Std Error	P-value	Estimate	Std Error	P-value
Offspring effect	0.0262123	0.0239003	0.272756	1.85917	0.517239	0.000325122
Prenatal maternal effect	0.0173508	0.0562694	0.757815	0.548982	0.91535	0.548672
Postnatal maternal effect	-0.00687975	0.0442946	0.87657	-0.291488	0.870745	0.737808
Postnatal paternal effect	0.0220905	0.0316883	0.485728	0.824488	0.661738	0.212785
PRS: polygenic risk score constructed using 72 SNPs from Okbay et al. 2016; Std Error: standard error.
